# Supplementary material for: Water-catalysis in the gas phase reaction of dithioformic acid with hydroxyl radical: global reaction route mapping of oxidative pathways for hydrogen abstraction
Source: Royal Society of Chemistry journal article supplement (doi:10.1039/c5ra08741d), 2015-01-01
Supplement: c5ra08741d1.pdf [file c5ra08741d1.pdf]

## **Supporting Information**

# **Water-catalysis in the Gas Phase Reaction of Dithioformic acid with Hydroxyl Radical: Global Reaction Route Mapping of Oxidative Pathways for Hydrogen abstraction**

**Gurpreet Kaur and Vikas\***

*Quantum Chemistry Group, Department of Chemistry & Centre of Advanced Studies in*

*Chemistry, Panjab University, Chandigarh- 160014 INDIA.*

\*Corresponding author (Email: qlabspu@pu.ac.in, qlabspu@yahoo.com)

**Table of contents**

|                                                                                                                                                                                                                                                                                                                 |       |
|-----------------------------------------------------------------------------------------------------------------------------------------------------------------------------------------------------------------------------------------------------------------------------------------------------------------|-------|
| Energy (in a.u.), zero-point energy (ZPE) (in a.u.), imaginary frequencies (in $\text{cm}^{-1}$ ), and final Cartesian coordinates (in angstroms) of different species explored along various reaction pathways for H-abstraction at BHandHLYP/6-311++G(d,p) level of theory (depicted in Figures 1 and 2)..... | 3-15  |
| Input and options applied in GRRM run.....                                                                                                                                                                                                                                                                      | 16-17 |

Energy (in a.u.), zero-point energy (ZPE) (in a.u.), imaginary frequencies (in  $\text{cm}^{-1}$ ), and final Cartesian coordinates (in angstroms) of different species explored along various reaction pathways for H-abstraction at BHandHLYP/6-311++G(d,p) level of theory (depicted in Figures 1 and 2):

### Path 1

B1

Energy = -911.3994 a.u.

ZPE= 0.0382 a.u.

No imaginary frequency

Cartesian coordinates

|   |                 |                 |                 |
|---|-----------------|-----------------|-----------------|
| C | -0.505240303100 | 0.013534252595  | -0.024723387913 |
| H | -0.832286958138 | 0.009206910146  | 1.007742658549  |
| S | 1.072809181518  | 0.050081165188  | -0.387812321079 |
| O | 1.053017744048  | 0.061290707159  | 2.948698094864  |
| H | 1.417056447721  | 0.066666112665  | 2.049768234204  |
| S | -1.854702813098 | -0.022328908728 | -1.091803759706 |
| H | -1.160579554740 | -0.009574625020 | -2.236632807078 |

TS1

Energy = -911.3857 a.u.

ZPE= 0.0333 a.u.

One imaginary frequency = -1364.2611

Cartesian coordinates

|   |                 |                 |                 |
|---|-----------------|-----------------|-----------------|
| C | -0.027638138637 | 0.060766043327  | -0.017798036302 |
| H | 0.068790094562  | 0.158189842430  | 1.161172121551  |
| S | 1.267875625728  | 0.052290545415  | -0.948627021185 |
| O | 0.024716616115  | 0.089546214918  | 2.521407913819  |
| H | 0.702038793455  | -0.574497859205 | 2.668879703269  |
| S | -1.706543484176 | -0.037730842130 | -0.361238852098 |
| H | -1.602117507052 | -0.112108944759 | -1.695256829059 |

P1

Energy = -911.4312 a.u.

ZPE= 0.0384 a.u.

No imaginary frequency

Cartesian coordinates

|   |                 |                 |                 |
|---|-----------------|-----------------|-----------------|
| C | -0.133442629317 | 0.020296877599  | -0.259450128038 |
| H | 0.241819747098  | 0.052254200194  | 2.068937438159  |
| S | 1.272066005477  | 0.055939220968  | -0.954279655978 |
| O | 0.207439088717  | 0.060680074315  | 3.022321768303  |
| H | 1.112362050568  | 0.104624462099  | 3.309341426001  |
| S | -1.775430380982 | -0.032030498644 | -0.557062978032 |
| H | -1.784442085615 | -0.045292254994 | -1.908760563462 |

## Path II

B2

Energy = -911.4032 a.u.

ZPE= 0.0395 a.u.

No imaginary frequency

Cartesian coordinates

|   |                 |                 |                 |
|---|-----------------|-----------------|-----------------|
| C | 0.019030246655  | -0.064741507883 | 0.029682068663  |
| H | -0.102391769780 | -0.195992535931 | 1.096311973514  |
| S | 1.661101356224  | 0.022108650010  | -0.427615611279 |
| H | -0.576760398065 | 0.609064336302  | -3.399727374985 |
| O | -0.028085746630 | -0.054844340042 | -2.980839002809 |
| H | 1.405716998026  | 0.137572191786  | -1.750388314157 |
| S | -1.311991375401 | 0.013764029929  | -0.901510992024 |

TS2

Energy = -911.3920 a.u.

ZPE= 0.0345 a.u.

One imaginary frequency = -1206.5692

Cartesian coordinates

|   |                 |                 |                |
|---|-----------------|-----------------|----------------|
| C | -0.001092861638 | -0.000157345762 | 0.061648664324 |
| H | 0.078462405515  | -0.000781311882 | 1.142459251252 |

|   |                 |                |                 |
|---|-----------------|----------------|-----------------|
| S | 1.567226706965  | 0.000023072828 | -0.629936090244 |
| H | -0.432902540315 | 0.001045550187 | -2.854684112174 |
| O | 0.482951996519  | 0.001036125276 | -3.173410827372 |
| H | 1.193190151561  | 0.000936929358 | -2.023385596385 |
| S | -1.469856858607 | 0.000420979992 | -0.625109289401 |

P2

Energy = -911.4462 a.u.

ZPE= 0.0419 a.u.

No imaginary frequency

Cartesian coordinates

|   |                 |                 |                 |
|---|-----------------|-----------------|-----------------|
| C | 0.001470130482  | -0.004037850983 | 0.100411542358  |
| H | 0.057653260072  | -0.012216740659 | 1.185501346541  |
| S | 1.555192852306  | -0.017780161641 | -0.584614565745 |
| H | -0.355726164863 | -0.026853343134 | -2.808793482604 |
| O | 0.519798094144  | -0.027988688077 | -3.199490579097 |
| H | 0.569903219733  | 0.753230607901  | -3.740202273754 |
| S | -1.459233379080 | 0.012139836790  | -0.620523969810 |

### Path III

B3

Energy = -912.08455 a.u.

ZPE= 0.0517 a.u.

No imaginary frequency

Cartesian coordinates

|   |                 |                 |                 |
|---|-----------------|-----------------|-----------------|
| C | 1.273978621019  | -0.089421769584 | -0.106840284690 |
| H | 1.942014555667  | -0.163945433431 | 0.742330737978  |
| S | 2.128814560741  | -0.292473660713 | -1.588865763469 |
| H | 1.078395116406  | -0.153284563620 | -2.407185793361 |
| H | 1.220170852066  | -0.164362888905 | 3.878812311881  |
| O | 1.385225374938  | 0.136154484946  | 2.992846072622  |
| H | 0.530227792007  | 0.231432444626  | 2.576650562089  |
| S | -0.306924797848 | 0.181008399679  | 0.116820689952  |

C1

Energy = -987.8294 a.u.

ZPE= 0.0641 a.u.

No imaginary frequency

Cartesian coordinates

|   |                 |                 |                 |
|---|-----------------|-----------------|-----------------|
| C | -0.182441529811 | -0.016411167381 | -0.062284723385 |
| H | -0.226556995558 | -0.045052145259 | 1.020548259125  |
| S | 1.239877656654  | 0.002255359402  | -0.844669815404 |
| H | 2.608162219178  | -0.114163213186 | 1.159093280611  |
| O | 2.816203556978  | -0.176235895940 | 2.094987953010  |
| H | 3.694049797934  | 0.166815615769  | 2.216333987194  |
| H | 1.267644937738  | -0.099263194231 | 3.034721372552  |
| O | 0.317395791039  | -0.051273122531 | 3.246042119496  |
| S | -1.763451290643 | 0.003802560065  | -0.737039802946 |
| H | -1.395748771240 | 0.037407238154  | -2.024337893382 |

TS3

Energy = -987.8124 a.u.

ZPE= 0.0589 a.u.

One imaginary frequency = -1982.8690

Cartesian coordinates

|   |                 |                 |                 |
|---|-----------------|-----------------|-----------------|
| C | -0.044600823720 | -0.005210904469 | 0.009545900904  |
| H | -0.008006435231 | -0.011376619011 | 1.234433169161  |
| S | 1.286540351342  | -0.003840501504 | -0.880962458650 |
| H | 2.810396070377  | -0.140270803312 | 1.205991349115  |
| O | 2.823544383646  | -0.184486573719 | 2.161368426695  |
| H | 3.499564003250  | 0.417818038994  | 2.451839704597  |
| H | 0.968326876431  | -0.109151754423 | 2.625450264201  |
| O | 0.009217077257  | -0.043190932972 | 2.508294465014  |
| S | -1.704213554232 | -0.000493768419 | -0.403652844193 |
| H | -1.551056949120 | 0.006959818830  | -1.735960976847 |

P3

Energy = -987.8537 a.u.

ZPE= 0.0635 a.u.

No imaginary frequency

Cartesian coordinates

|   |                 |                 |                 |
|---|-----------------|-----------------|-----------------|
| C | -0.178903042864 | 0.036492207722  | -0.306304562456 |
| H | -0.102576966690 | 0.133024455294  | 2.348918455572  |
| S | 1.262242256681  | 0.078589517499  | -0.928134204128 |
| H | 2.844233324990  | -0.191222792783 | 1.322878648220  |
| O | 2.963671888008  | -0.321375747059 | 2.259812701028  |
| H | 3.682526547675  | 0.244894137213  | 2.518727036943  |
| H | 1.174854495081  | -0.141444234206 | 3.096764784818  |
| O | 0.243534896929  | 0.036286836817  | 3.229319068369  |
| S | -1.801124775547 | -0.046620131721 | -0.682377488334 |
| H | -1.742510177022 | -0.089209562359 | -2.032420101471 |

**Path IV**

B4

Energy = -912.0876 a.u.

ZPE= 0.0524 a.u.

No imaginary frequency

Cartesian coordinates

|   |                 |                 |                 |
|---|-----------------|-----------------|-----------------|
| C | 0.631268191163  | -0.068464801679 | 0.156895104212  |
| H | 1.045356638677  | -0.116766275169 | 1.155630829667  |
| S | 1.895919354883  | -0.081620772136 | -1.006780877335 |
| H | 1.138347605411  | -0.021726275163 | -2.119213056088 |
| H | -0.906214164855 | -0.351425619001 | -3.991045301104 |
| O | -0.472984203009 | 0.153510489082  | -3.311851108562 |
| H | -1.035483459967 | 0.121437154765  | -2.536588447124 |
| S | -0.979932763303 | 0.004451572303  | -0.029852567668 |

C2

Energy = -987.8234 a.u.

ZPE= 0.0632 a.u.

No imaginary frequency

Cartesian coordinates

|   |                |                 |                 |
|---|----------------|-----------------|-----------------|
| C | 0.651174350257 | -0.068542814983 | 0.170595927869  |
| H | 1.050215215445 | -0.106952744345 | 1.174565631626  |
| S | 1.895174126239 | -0.084431653583 | -1.004899269911 |
| H | 1.126148283112 | -0.030504546354 | -2.109903239707 |

|   |                 |                 |                 |
|---|-----------------|-----------------|-----------------|
| H | -0.891345251990 | -0.333693425493 | -4.023935756504 |
| O | -0.474321637071 | 0.141655221028  | -3.313852795728 |
| H | -1.076519215466 | 0.120405998449  | -2.570364156745 |
| H | -1.690069489290 | -0.160410072545 | 2.778233282363  |
| O | -0.820531637627 | 0.227646325229  | 2.658928884560  |
| S | -0.964248670938 | 0.001459438066  | -0.005011764448 |

TS4

Energy = -987.8097 a.u.

ZPE= 0.0580 a.u.

One imaginary frequency = -1440.8972

Cartesian coordinates

|   |                 |                 |                 |
|---|-----------------|-----------------|-----------------|
| C | -0.208533042146 | -0.123361450843 | 0.088382307931  |
| H | -0.124564384758 | -0.211578463705 | 1.273404946070  |
| S | 1.384189927812  | -0.001224009948 | -0.512207608859 |
| H | 1.080770257599  | 0.055021725315  | -1.825115679186 |
| H | 0.000150038146  | -0.282808501506 | -4.375472500610 |
| O | 0.029368493924  | 0.158349280801  | -3.533516318654 |
| H | -0.832553372651 | 0.055911989940  | -3.134806485742 |
| H | -0.609951305162 | 0.502823087241  | 2.827280659423  |
| O | 0.075459903054  | -0.131616355578 | 2.605771616599  |
| S | -1.659556515822 | -0.146654301716 | -0.596028936977 |

P4

Energy = -987.8543 a.u.

ZPE= 0.0627 a.u.

No imaginary frequency

Cartesian coordinates

|   |                 |                 |                 |
|---|-----------------|-----------------|-----------------|
| C | -0.025358010454 | 0.009272496203  | -0.139372387886 |
| H | -0.066807377473 | -0.040978660141 | 2.241788048431  |
| S | 1.527566820901  | 0.012837597868  | -0.746319188923 |
| H | 1.249226145159  | 0.040773278487  | -2.072345544566 |
| H | 0.005275297376  | -0.128735896631 | -4.612346988494 |
| O | 0.016881730829  | 0.123647958659  | -3.695488249719 |
| H | -0.886743530703 | 0.107990726779  | -3.392901087122 |
| H | -0.939875241460 | -0.005379645910 | 3.477838354147  |
| O | -0.034140979868 | -0.059438833159 | 3.195038402145  |
| S | -1.549184409181 | 0.027634593935  | -0.534734936451 |



**Path V**

B5

Energy = -912.08455 a.u.

ZPE= 0.0517 a.u.

No imaginary frequency

Cartesian coordinates

|   |                 |                 |                 |
|---|-----------------|-----------------|-----------------|
| C | 1.273978621019  | -0.089421769584 | -0.106840284690 |
| H | 1.942014555667  | -0.163945433431 | 0.742330737978  |
| S | 2.128814560741  | -0.292473660713 | -1.588865763469 |
| H | 1.078395116406  | -0.153284563620 | -2.407185793361 |
| H | 1.220170852066  | -0.164362888905 | 3.878812311881  |
| O | 1.385225374938  | 0.136154484946  | 2.992846072622  |
| H | 0.530227792007  | 0.231432444626  | 2.576650562089  |
| S | -0.306924797848 | 0.181008399679  | 0.116820689952  |

C3

Energy =-987.8227 a.u.

ZPE= 0.0629 a.u.

No imaginary frequency

Cartesian coordinates

|   |                 |                 |                 |
|---|-----------------|-----------------|-----------------|
| C | 1.248517352416  | -0.085441170836 | -0.118716694471 |
| H | 1.885420212270  | -0.161154675471 | 0.753523901733  |
| S | 2.145615500755  | -0.299223685787 | -1.563571713531 |
| H | 1.136539658426  | -0.160660055172 | -2.439470237987 |
| H | 1.311643354122  | -0.156443459484 | 3.868938835590  |
| O | 1.379110235657  | 0.117423883858  | 2.961676990184  |
| H | 0.485720050078  | 0.231170430634  | 2.645474660598  |
| H | -1.106919520519 | 0.236259382346  | -2.232414235986 |
| O | -0.942612596996 | 0.162621402603  | -3.187301816321 |
| S | -0.340664288276 | 0.199435744171  | 0.096712790049  |

TS5

Energy = -987.8139 a.u.

ZPE= 0.0589 a.u.

One imaginary frequency= -1194.2058

## Cartesian coordinates

|   |                 |                 |                 |
|---|-----------------|-----------------|-----------------|
| C | 1.136464687431  | -0.070273108975 | -0.155878955748 |
| H | 1.825899145551  | -0.158682705482 | 0.676580326491  |
| S | 1.951169143923  | -0.271867934906 | -1.643740773864 |
| H | 0.832326471880  | -0.110775178952 | -2.538107734433 |
| H | 1.515128546433  | -0.200263024948 | 3.803479153753  |
| O | 1.497832075078  | 0.095113013272  | 2.900595181427  |
| H | 0.579426914213  | 0.219319589213  | 2.672980751237  |
| H | -0.945365460804 | 0.213941919066  | -2.254408781638 |
| O | -0.408263484618 | 0.084478405588  | -3.050847375936 |
| S | -0.433619039085 | 0.218178026112  | 0.160722208699  |

## P5

Energy = -987.8686 a.u.

ZPE= 0.0664 a.u.

No imaginary frequency

## Cartesian coordinates

|   |                 |                 |                 |
|---|-----------------|-----------------|-----------------|
| C | 1.186235478589  | -0.086316372069 | -0.132944780179 |
| H | 1.867600329599  | -0.176740636672 | 0.710037829903  |
| S | 1.978137424028  | -0.293726254954 | -1.611670743650 |
| H | -0.563124414360 | 0.863505517217  | -3.572114384416 |
| H | 1.379408924466  | -0.272417734132 | 3.796961637010  |
| O | 1.456902609978  | 0.120981274742  | 2.935600273131  |
| H | 0.565900839317  | 0.235202192859  | 2.610025446645  |
| H | -0.873914755456 | 0.171739380755  | -2.247252946987 |
| O | -0.415436812446 | 0.061950580385  | -3.081424465521 |
| S | -0.393162586534 | 0.212340320673  | 0.171952795311  |

ENERGY = -987.868640275639

**Path VI**

## B6

Energy = -912.0876 a.u.

ZPE= 0.0524 a.u.

No imaginary frequency

## Cartesian coordinates

|   |                |                 |                |
|---|----------------|-----------------|----------------|
| C | 0.631268191163 | -0.068464801679 | 0.156895104212 |
|---|----------------|-----------------|----------------|

|   |                 |                 |                 |
|---|-----------------|-----------------|-----------------|
| H | 1.045356638677  | -0.116766275169 | 1.155630829667  |
| S | 1.895919354883  | -0.081620772136 | -1.006780877335 |
| H | 1.138347605411  | -0.021726275163 | -2.119213056088 |
| H | -0.906214164855 | -0.351425619001 | -3.991045301104 |
| O | -0.472984203009 | 0.153510489082  | -3.311851108562 |
| H | -1.035483459967 | 0.121437154765  | -2.536588447124 |
| S | -0.979932763303 | 0.004451572303  | -0.029852567668 |

C4

Energy = -987.8302 a.u.

ZPE= 0.0642 a.u.

No imaginary frequency

Cartesian coordinates

|   |                 |                 |                 |
|---|-----------------|-----------------|-----------------|
| C | -0.123282462881 | -0.084756988032 | 0.304295799439  |
| H | -0.307539539955 | -0.129714407571 | 1.369915304915  |
| H | 2.257966093443  | -0.842965215612 | -4.003322237122 |
| O | 1.401761767517  | -0.638989292142 | -3.645275032841 |
| H | 1.440046115523  | -0.775739690626 | -2.695131009812 |
| H | 0.064569207828  | 0.487404716255  | -3.980260936765 |
| O | -0.701741587265 | 1.069448823630  | -3.817770480451 |
| S | -1.315455972747 | 0.888965063085  | -0.448244218946 |
| H | -0.906599278546 | 0.812983054874  | -1.728808438134 |
| S | 1.150328061477  | -0.893581429129 | -0.298089068465 |

TS6

Energy = -987.8176 a.u.

ZPE= 0.0605 a.u.

One imaginary frequency = -1519.6412

Cartesian coordinates

|   |                 |                 |                 |
|---|-----------------|-----------------|-----------------|
| C | -0.073668625151 | -0.000476522456 | 0.159761260250  |
| H | -0.154329930769 | 0.151465121571  | 1.230369160359  |
| H | 2.445212523187  | 0.235882633079  | -3.637155002418 |
| O | 1.621307778808  | -0.223510502184 | -3.517504759251 |
| H | 1.647902037329  | -0.640678546129 | -2.653212093633 |
| H | -0.007041547997 | 0.402957525070  | -3.515592419556 |
| O | -0.944033057583 | 0.622664761607  | -3.335567513963 |
| S | -1.160379122243 | 1.057319742557  | -0.630768568449 |

|   |                 |                 |                 |
|---|-----------------|-----------------|-----------------|
| H | -1.091939869213 | 0.612403700938  | -2.023281666320 |
| S | 0.979099813636  | -1.115488914051 | -0.380144397016 |

P6

Energy = -987.8736 a.u.

ZPE= 0.0675 a.u.

No imaginary frequency

Cartesian coordinates

|   |                 |                 |                 |
|---|-----------------|-----------------|-----------------|
| C | -0.117869842159 | -0.075911030339 | 0.270212348796  |
| H | -0.375390127649 | -0.061364717870 | 1.325940748211  |
| H | 2.351663035961  | -0.029001967119 | -3.715582513960 |
| O | 1.490453685129  | -0.377304575133 | -3.513530433769 |
| H | 1.501473594120  | -0.617823439611 | -2.583169187198 |
| H | -0.104497377862 | 0.514193550814  | -3.675993693375 |
| O | -0.968679927635 | 0.904580500099  | -3.508299768953 |
| S | -1.159747663182 | 0.901174248232  | -0.637375256640 |
| H | -1.586718987677 | 0.405811710095  | -4.030578571104 |
| S | 1.144376092191  | -0.985970396266 | -0.222228589371 |

**Path VII**

B2

Energy = -911.4032 a.u.

ZPE= 0.0394 a.u.

No imaginary frequency

Cartesian coordinates

|   |                 |                 |                 |
|---|-----------------|-----------------|-----------------|
| C | 0.019030246655  | -0.064741507883 | 0.029682068663  |
| H | -0.102391769780 | -0.195992535931 | 1.096311973514  |
| S | 1.661101356224  | 0.022108650010  | -0.427615611279 |
| H | -0.576760398065 | 0.609064336302  | -3.399727374985 |
| O | -0.028085746630 | -0.054844340042 | -2.980839002809 |
| H | 1.405716998026  | 0.137572191786  | -1.750388314157 |
| S | -1.311991375401 | 0.013764029929  | -0.901510992024 |

C5

Energy = -987.8286 a.u.

ZPE= 0.0650 a.u.

No imaginary frequency

Cartesian coordinates

|   |                 |                 |                 |
|---|-----------------|-----------------|-----------------|
| C | 1.469253697616  | 0.316094619676  | -0.174990977005 |
| H | 2.395130164236  | 0.265367539424  | -0.730883864902 |
| S | 0.711382942880  | -1.086057703594 | 0.166503348060  |
| H | -2.218732163830 | -0.387348308063 | -0.452814757809 |
| O | -2.670373729691 | -0.589598996180 | -1.277271773997 |
| H | -3.501611174269 | -0.132742798532 | -1.235728800660 |
| H | -1.264036588502 | -0.531370232117 | 1.817475116262  |
| O | -1.170577788403 | 0.019576460324  | 1.041254271250  |
| S | 1.009689674039  | 1.905728754275  | 0.210830301053  |
| H | -0.133940762149 | 1.527731914618  | 0.836537236144  |

TS7

Energy = -987.8280 a.u.

ZPE= 0.0635 a.u.

One imaginary frequency = -467.4213

Cartesian coordinates

|   |                 |                 |                 |
|---|-----------------|-----------------|-----------------|
| C | 1.538387232957  | 0.328722111834  | -0.106594598766 |
| H | 2.516078473838  | 0.246253632251  | -0.559781050355 |
| S | 0.692245377222  | -1.064354670884 | 0.103918842668  |
| H | -2.279946499324 | -0.416380633968 | -0.471009692122 |
| O | -2.800171720503 | -0.762549762778 | -1.202021026005 |
| H | -3.568917827473 | -0.208228324046 | -1.257793392964 |
| H | -1.252568145486 | -0.244412567265 | 1.729523028034  |
| O | -1.133541746989 | 0.168801760781  | 0.875548586002  |
| S | 1.051767701389  | 1.891217446827  | 0.293652203578  |
| H | -0.185269085630 | 1.384018492250  | 0.767064830931  |

P7

Energy = -987.8736 a.u.

ZPE= 0.0675 a.u.

No imaginary frequency

## Cartesian coordinates

|   |                 |                 |                 |
|---|-----------------|-----------------|-----------------|
| C | 1.657388814462  | 0.264722204339  | -0.096101897421 |
| H | 2.726053008742  | 0.167817400824  | -0.268308794695 |
| S | 0.820560136462  | -1.122451718507 | -0.585333010464 |
| H | -2.278323974015 | -0.393556438636 | 0.022767749440  |
| O | -2.057445979385 | -1.145170059841 | -0.537252421052 |
| H | -2.552226592880 | -1.027121608049 | -1.340216878078 |
| H | -2.467308549900 | 1.270945767926  | 1.901389510617  |
| O | -2.216553548746 | 1.163312473347  | 0.990686810746  |
| S | 1.085017074901  | 1.646851006549  | 0.556691263664  |
| H | -1.290298304111 | 1.411837305175  | 0.928446010870  |

**Path VIII**

B2

Energy = -911.4032 a.u.

ZPE= 0.0394 a.u.

No imaginary frequency

## Cartesian coordinates

|   |                 |                 |                 |
|---|-----------------|-----------------|-----------------|
| C | 0.019030246655  | -0.064741507883 | 0.029682068663  |
| H | -0.102391769780 | -0.195992535931 | 1.096311973514  |
| S | 1.661101356224  | 0.022108650010  | -0.427615611279 |
| H | -0.576760398065 | 0.609064336302  | -3.399727374985 |
| O | -0.028085746630 | -0.054844340042 | -2.980839002809 |
| H | 1.405716998026  | 0.137572191786  | -1.750388314157 |
| S | -1.311991375401 | 0.013764029929  | -0.901510992024 |

C8

Energy = -987.8286 a.u.

ZPE= 0.0650 a.u.

No imaginary frequency

## Cartesian coordinates

|   |                 |                 |                |
|---|-----------------|-----------------|----------------|
| C | 1.254680723976  | 0.245528171567  | 0.633833645722 |
| H | 1.970634990884  | 0.481014764827  | 1.408928957679 |
| S | 0.405108695952  | -1.137927056539 | 0.780205469791 |
| H | -3.835812916908 | 0.338776898283  | 0.132473382795 |
| O | -3.134844567008 | -0.045663747792 | 0.644558660516 |

|   |                 |                 |                 |
|---|-----------------|-----------------|-----------------|
| H | -2.438843104179 | -0.260102974981 | 0.016705031944  |
| H | -0.911736356474 | -1.487207068372 | -1.473345030186 |
| O | -0.956296686623 | -0.623198488235 | -1.065437969531 |
| S | 1.180627197991  | 1.425685263722  | -0.586291975702 |
| H | 0.208030510169  | 0.783886781227  | -1.283006540513 |

TS8

Energy = -987.8123 a.u.

ZPE= 0.0595 a.u.

One imaginary frequency = -1195.9229

Cartesian coordinates

|   |                 |                 |                 |
|---|-----------------|-----------------|-----------------|
| C | 1.499409518897  | 0.118300109911  | 0.548513225797  |
| H | 2.366087963756  | 0.557699892420  | 1.028574022320  |
| S | 1.173217640978  | -1.452227469295 | 0.783751945516  |
| H | -4.341980134779 | 0.777573728388  | -0.415463688334 |
| O | -3.579082622675 | 0.860071222169  | 0.144488237593  |
| H | -2.894935170347 | 0.336086461621  | -0.266403596607 |
| H | -0.799413274817 | -1.239616263765 | -0.561390244760 |
| O | -1.251073884517 | -0.540085127923 | -1.064120149487 |
| S | 0.684242598789  | 1.314019302148  | -0.369852225271 |
| H | -0.351062727275 | 0.487013787313  | -0.924156592796 |

P8

Energy = -987.8736 a.u.

ZPE= 0.0675 a.u.

No imaginary frequency

Cartesian coordinates

|   |                 |                 |                 |
|---|-----------------|-----------------|-----------------|
| C | 1.457417033612  | 0.275332672940  | 0.527358187957  |
| H | 2.440737041679  | 0.599295089693  | 0.857920156438  |
| S | 1.154893613248  | -1.323518973816 | 0.400371544092  |
| H | -2.993428660361 | 1.258389172724  | 0.238817127215  |
| O | -2.322302688300 | 1.131152383137  | -0.422187041944 |
| H | -2.350524823428 | 0.196327386871  | -0.651811158874 |
| H | -1.061230242743 | -1.636868976869 | -0.509584658753 |
| O | -1.956196732855 | -1.582616907878 | -0.855527000451 |
| S | 0.440715272053  | 1.592869587774  | 0.220362314950  |
| H | -1.962453445390 | -2.067537668209 | -1.673245914949 |

**Input and options applied in GRRM run**

Without water

# GRRM/BHandHLYP/6-311++G\*\*

0 2

|   |                 |                 |                 |   |
|---|-----------------|-----------------|-----------------|---|
| C | -0.505240303100 | 0.013534252595  | -0.024723387913 | 1 |
| H | -0.832286958138 | 0.009206910146  | 1.007742658549  | 1 |
| S | 1.072809181518  | 0.050081165188  | -0.387812321079 | 1 |
| O | 1.053017744048  | 0.061290707159  | 2.948698094864  | 2 |
| H | 1.417056447721  | 0.066666112665  | 2.049768234204  | 2 |
| S | -1.854702813098 | -0.022328908728 | -1.091803759706 | 1 |
| H | -1.160579554740 | -0.009574625020 | -2.236632807078 | 1 |

Options

LADD=5

NRUN=20

NLowest=20

EQOnly

UpDC=15

DownDC=15

With water

# GRRM/BHandHLYP/6-311++G\*\*

0 2

|   |                 |                 |                 |   |
|---|-----------------|-----------------|-----------------|---|
| C | 0.363371778557  | -0.157405036628 | 0.673496468000  | 1 |
| H | -0.428170500687 | -0.777148748083 | 0.267700040972  | 1 |
| S | 0.469423247043  | 1.419448240362  | 0.302400532773  | 1 |
| H | -2.775656352298 | 1.826297940890  | -1.870786018699 | 2 |
| O | -2.194495697730 | 1.096899893129  | -1.688324074792 | 2 |
| H | -1.448143431417 | 1.439652247707  | -1.189836979358 | 2 |
| H | -2.431087116561 | -0.643677144652 | -1.238899033975 | 3 |
| O | -2.300015033106 | -1.517010889889 | -0.826456995906 | 3 |
| S | 1.395729848978  | -1.077333799941 | 1.694977887484  | 1 |
| H | 2.231524034154  | -0.084748976692 | 2.026266962679  | 1 |

Options

LADD=5

NRUN=20

NLowest=20



EQOnly  
UpDC=15  
DownDC=15
